# Supplementary material for: Ion chromatography for monitoring [NTf2]− anion contaminants in pure and saline water
Source: Royal Society of Chemistry journal article supplement (doi:10.1039/d0ay00337a), 2020-01-01
Supplement: d0ay00337a1.pdf [file d0ay00337a1.pdf]

## Supporting Information

### Ion chromatography for monitoring [NTf<sub>2</sub>]<sup>-</sup> anion contaminants in pure and saline water

Coby J. Clarke,<sup>ab\*</sup> Liem Bui-Le<sup>a</sup> and Jason Hallett<sup>a\*</sup>

Affiliations:

a) Department of Chemical Engineering, Imperial College London, UK

Current Address:

b) GSK Carbon Neutral Laboratory, University of Nottingham, UK

Email:

[pczjc@exmail.nottingham.ac.uk](mailto:pczjc@exmail.nottingham.ac.uk)

[j.hallett@imperial.ac.uk](mailto:j.hallett@imperial.ac.uk)

## 1. NMR Data

NMR were recorded on a JEOL ECZ 400MHz spectrometer with Royal HFX probe. Samples were prepared in DMSO-*d*<sub>6</sub> and spectra are referenced to the residual <sup>1</sup>H NMR signal at 2.50 ppm and the <sup>13</sup>C NMR signal at 39.52 ppm.

### 1-Butyl-3-methylimidazolium bis(trifluoromethylsulfonyl)imide, [C<sub>4</sub>C<sub>1</sub>Im][NTf<sub>2</sub>]:

<sup>1</sup>H NMR (400 MHz, DMSO-*d*<sub>6</sub>) δ 9.06 (s, 1H), 7.72 (t, *J* = 1.9 Hz, 1H), 7.65 (t, *J* = 1.7 Hz, 1H), 4.12 (t, *J* = 7.0 Hz, 2H), 3.80 (s, 3H), 1.80 – 1.61 (m, 2H), 1.27 – 1.14 (m, 2H), 0.86 (t, *J* = 7.3 Hz, 3H). <sup>13</sup>C NMR (101 MHz, DMSO-*d*<sub>6</sub>) δ 136.51, 123.63, 122.27, 119.49 (q, *J* = 322.0 Hz), 48.51, 35.74, 31.37, 18.78, 13.25. <sup>19</sup>F NMR (376 MHz, DMSO-*d*<sub>6</sub>) δ -78.67.

Data consistent with previous reported.<sup>1</sup>

### 1-Octyl-3-methylimidazolium bis(trifluoromethylsulfonyl)imide, [C<sub>8</sub>C<sub>1</sub>Im][NTf<sub>2</sub>]:

<sup>1</sup>H NMR (400 MHz, DMSO-*d*<sub>6</sub>) δ 9.09 (s, 1H), 7.76 (t, *J* = 1.8 Hz, 1H), 7.69 (t, *J* = 1.8 Hz, 1H), 4.14 (t, *J* = 7.2 Hz, 2H), 3.84 (s, 3H), 1.34 – 1.18 (m, 12H), 0.86 (t, *J* = 7.0 Hz, 3H). <sup>13</sup>C NMR (101 MHz, DMSO-*d*<sub>6</sub>) δ 136.49, 123.63, 122.27, 119.49 (q, *J* = 322.0 Hz), 48.78, 35.75, 31.18, 29.39, 28.49, 28.35, 25.50, 22.07, 13.94. <sup>19</sup>F NMR (376 MHz, DMSO-*d*<sub>6</sub>) δ -78.66.

Data consistent with previous reported.<sup>1</sup>

### 1,6-bis(3-methylimidazolium)hexane di[bis(trifluoromethanesulfonyl)imide], [C<sub>6</sub>(C<sub>1</sub>Im)<sub>2</sub>][NTf<sub>2</sub>]:

<sup>1</sup>H NMR (400 MHz, DMSO-*d*<sub>6</sub>) δ 9.08 (s, 2H), 7.74 (s, 2H), 7.70 (s, 2H), 4.14 (t, *J* = 6.8 Hz, 4H), 3.84 (s, 6H), 1.90 – 1.68 (m, 4H), 1.38 – 1.17 (m, 4H). <sup>13</sup>C NMR (101 MHz, DMSO-*d*<sub>6</sub>) δ 136.49, 123.66, 122.25, 119.50 (d, *J* = 321.9 Hz), 48.68, 35.76, 29.15, 24.94. <sup>19</sup>F NMR (376 MHz, DMSO-*d*<sub>6</sub>) δ -78.66.

Data consistent with previous reported.<sup>2</sup>

### 1,12-Bis(3-methylimidazolium)dodecane di[bis(trifluoromethanesulfonyl)imide], [C<sub>12</sub>(C<sub>1</sub>Im)<sub>2</sub>][NTf<sub>2</sub>]:

<sup>1</sup>H NMR (400 MHz, DMSO-*d*<sub>6</sub>) δ 9.09 (s, 2H), 7.75 (d, *J* = 1.7 Hz, 2H), 7.69 (d, *J* = 1.9 Hz, 2H), 4.14 (t, *J* = 7.3 Hz, 2H), 3.84 (s, 6H), 1.89 – 1.62 (m, 2H), 1.45 – 1.12 (m, 8H). <sup>13</sup>C NMR (101 MHz, DMSO-*d*<sub>6</sub>) δ 136.49, 123.62, 122.26, 119.50 (q, *J* = 322.1 Hz), 48.80, 35.74, 29.42, 28.99, 28.88, 28.44, 25.54. <sup>19</sup>F NMR (376 MHz, DMSO-*d*<sub>6</sub>) δ -78.68.

Data consistent with previous reported.<sup>2</sup>

### Tetraoctylphosphonium bis(trifluoromethylsulfonyl)imid, [P<sub>8888</sub>][NTf<sub>2</sub>]:

<sup>1</sup>H NMR (400 MHz, DMSO-*d*<sub>6</sub>) δ 2.26 – 2.06 (m, 8H), 1.52 – 1.42 (m, 8H), 1.42 – 1.33 (m, 8H), 1.33 – 1.21 (m, 32H), 1.02 – 0.75 (m, 12H). <sup>19</sup>F NMR (376 MHz, DMSO-*d*<sub>6</sub>) δ -78.67.

Data consistent with previous reported.<sup>3</sup>

### Trihexyltetradecylphosphonium bis(trifluoromethylsulfonyl)amide, [P<sub>66614</sub>][NTf<sub>2</sub>]:

<sup>1</sup>H NMR (400 MHz, DMSO-*d*<sub>6</sub>) δ 2.27 – 2.05 (m, 8H), 1.52 – 1.42 (m, 8H), 1.42 – 1.34 (m, 8H), 1.33 – 1.20 (m, 32H), 0.98 – 0.72 (m, 12H). <sup>13</sup>C NMR (101 MHz, DMSO-*d*<sub>6</sub>) δ 31.24, 30.33, 29.97, 29.82, 29.75, 29.60, 28.97, 28.89, 28.65, 28.57, 28.02, 22.03, 21.74, 20.49, 20.45, 20.39, 17.71, 17.62, 17.24, 17.15, 13.86, 13.77. <sup>19</sup>F NMR (376 MHz, DMSO-*d*<sub>6</sub>) δ -78.67. <sup>31</sup>P NMR (162 MHz, DMSO-*d*<sub>6</sub>) δ 34.36.

Data consistent with previous reported.<sup>3</sup>

## 2. Equations

$$R = \frac{(t_{r2} - t_{r1})}{(0.5(w_1 + w_2))} \quad (S1)$$

Where  $t_{rn}$  is the retention time, and  $w_n$  is the baseline peak width.

$$k = \frac{(t_R - t_0)}{t_0} \quad (S2)$$

Where  $t_R$  is the retention time of the  $[\text{NTf}_2]^-$  analyte and  $t_0$  is the retention time of a non-retained analyte, here we used the retention time of water from the sample matrix.

## 3. Additional Information

**Table S1** Retention times for 1 mM  $[\text{NTf}_2]^-$  and 1 mM  $\text{Cl}^-$  as a function of NaOH total eluent strength for 30% MeCN at 1 mL/min.

| NaOH (mM) | Retention Time / min |          |               |          |
|-----------|----------------------|----------|---------------|----------|
|           | $[\text{NTf}_2]^-$   | $\sigma$ | $\text{Cl}^-$ | $\sigma$ |
| 5         | 25.380               | 0.029    | 4.847         | 0.011    |
| 10        | 15.722               | 0.029    | 3.853         | 0.014    |
| 20        | 9.634                | 0.007    | 3.258         | 0.005    |
| 30        | 7.694                | 0.004    | 3.075         | 0.006    |
| 40        | 6.760                | 0.004    | 3.003         | 0.005    |

**Table S2** Retention times for 1 mM  $[\text{NTf}_2]^-$  and 1 mM  $\text{Cl}^-$  as a function of MeCN eluent composition for 30 mM NaOH at 1 mL/min.

| MeCN (%) | Retention Time / min |          |               |          |
|----------|----------------------|----------|---------------|----------|
|          | $[\text{NTf}_2]^-$   | $\sigma$ | $\text{Cl}^-$ | $\sigma$ |
| 30       | 7.711                | 0.025    | 3.084         | 0.006    |
| 25       | 11.132               | 0.005    | 3.097         | 0.001    |
| 20       | 16.268               | 0.045    | 3.125         | 0.003    |
| 15       | 23.007               | 0.004    | 3.165         | 0.002    |
| 10       | 30.243               | 0.004    | 3.197         | 0.002    |

**Table S3** Resolution between Cl<sup>-</sup> and [NTf<sub>2</sub>]<sup>-</sup> as a function of NaOH total eluent strength for 30% MeCN at 1 mL/min.

| NaOH (mM) | Resolution | σ     |
|-----------|------------|-------|
| 5         | 43.759     | 0.291 |
| 10        | 9.586      | 0.134 |
| 20        | 3.143      | 0.042 |
| 30        | 1.820      | 0.051 |
| 40        | 1.299      | 0.021 |

**Table S4** Resolution between Cl<sup>-</sup> and [NTf<sub>2</sub>]<sup>-</sup> as a function of MeCN eluent composition for 30 mM NaOH at 1 mL/min.

| MeCN (%) | Resolution | σ     |
|----------|------------|-------|
| 30       | 1.820      | 0.051 |
| 25       | 4.817      | 0.100 |
| 20       | 11.922     | 0.223 |
| 15       | 23.215     | 2.945 |
| 10       | 29.385     | 3.796 |

**Table S5** Asymmetry factor for [NTf<sub>2</sub>]<sup>-</sup> as a function of NaOH total eluent strength for 30 % MeCN at 1 mL/min.

| NaOH (mM) | As                               |       |
|-----------|----------------------------------|-------|
|           | [NTf <sub>2</sub> ] <sup>-</sup> | σ     |
| 5         | 2.77                             | 0.003 |
| 10        | 2.495                            | 0.005 |
| 20        | 2.175                            | 0.006 |
| 30        | 2.005                            | 0.001 |
| 40        | 1.9                              | 0.004 |

**Table S6** Asymmetry factor for [NTf<sub>2</sub>]<sup>-</sup> as a function of MeCN eluent composition for 30 mM NaOH at 1 mL/min.

| MeCN (%) | As                               |       |
|----------|----------------------------------|-------|
|          | [NTf <sub>2</sub> ] <sup>-</sup> | σ     |
| 30       | 1.997                            | 0.012 |
| 25       | 2.355                            | 0.035 |
| 20       | 2.710                            | 0.020 |
| 15       | 3.007                            | 0.061 |
| 10       | 3.050                            | 0.062 |

**Table S7** Concentration dependant peak parameters for  $[\text{NTf}_2]^-$  for 20 mM NaOH and 30% MeCN at 1 mL/min, showing the retention time, asymmetry factor, signal-to-noise, absolute error, and relative error.

| Concentration / mM | Retention Time / min | As    | S/N   | $\sigma$ / mM | $\sigma$ / % |
|--------------------|----------------------|-------|-------|---------------|--------------|
| 0.001              | 9.933                | 1.043 | 1.167 | 0.003         | 370.0        |
| 0.005              | 9.904                | 1.008 | 3.560 | 0.000         | 1.500        |
| 0.01               | 9.911                | 1.143 | 7.967 | 0.000         | 6.000        |
| 0.1                | 9.872                | 1.290 | 86.83 | 0.002         | 1.525        |
| 1                  | 9.584                | 2.133 | 225.6 | 0.038         | 28.67        |
| 4                  | 9.172                | 3.133 | 251.0 | 0.369         | 11.29        |
| 10                 | 9.007                | 3.853 | 220.8 | 0.427         | 2.911        |
| 50                 | 7.916                | 5.310 | 161.4 | 0.407         | 3.644        |
| 100                | 7.182                | 6.497 | 132.9 | 0.246         | 0.542        |

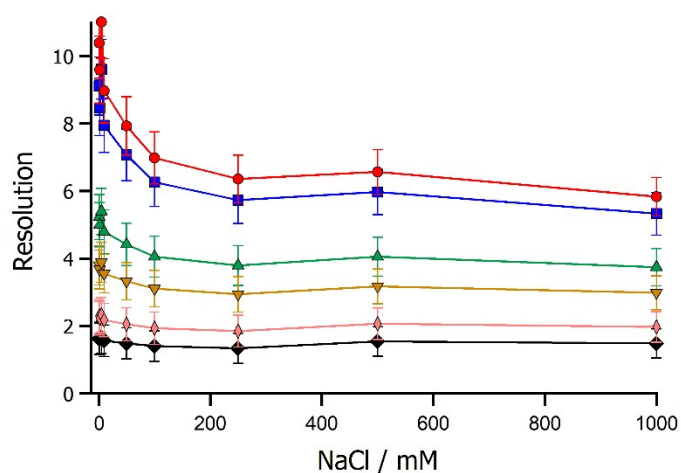

**Figure S1** Resolution of  $[\text{NTf}_2]^-$  and  $\text{Cl}^-$  for different concentration of NaCl: 0.1 mM (red circles), 1 mM (blue squares), 4 mM (green triangles), 10 mM (orange triangles), 50 mM (pink diamonds), and 100 mM (black diamonds) from 1 mL/min 20 mM NaOH and 30% MeCN.

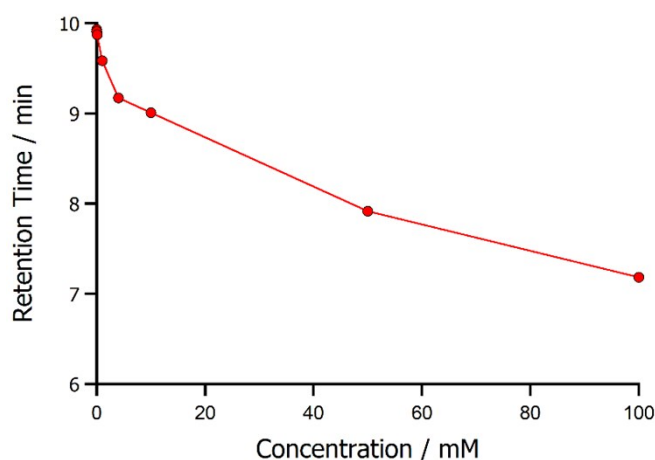

**Figure S2** Retention time of  $[\text{NTf}_2]^-$  for different analyte concentrations in 20 mM NaOH and 30% MeCN.

**Note: All chromatograms are available upon request**

- (1) Clarke, C. J., Ionic Liquids as Designer Molecules for XPS Peak Fitting, *Thesis*, University of Nottingham, 2016.
- (2) Mandai, T.; Imanari, M.; Nishikawa, K. Linker-Length Dependence of the Reorientational Dynamics and Viscosity of Bis(Imidazolium)-Based Ionic Liquids Incorporating Bis(Trifluoromethanesulfonyl) Amide Anions. *Chem. Phys. Lett.* **2012**, *543*, 72–75. <https://doi.org/10.1016/j.cplett.2012.06.026>.
- (3) Blundell, R. K.; Licence, P. Quaternary Ammonium and Phosphonium Based Ionic Liquids: A Comparison of Common Anions. *Phys. Chem. Chem. Phys.* **2014**, *16*, 15278–15288. <https://doi.org/10.1039/c4cp01901f>.
